# Supplementary material for: Potential and functional prediction of six circular RNAs as diagnostic markers for colorectal cancer
Source: PeerJ. 2022 May 19;10:e13420. doi: 10.7717/peerj.13420 (PMC9124462; doi:10.7717/peerj.13420)
Supplement: Data S1 [file peerj-10-13420-s002.xlsx]

## Sheet: Sheet1
Test_vs_Control 2.0 fold up regulated CircRNAs
	P-value and FDR		Fold change and Regulation		Annotations											Group--Raw Intensity		Group--Normalized Intensity		Raw Intensity						Normalized Intensity						miRNA Binding Sites
probeID	P-value	FDR	FC (abs)	Regulation	circRNA	Alias	source	chrom	strand	txStart	txEnd	circRNA_type	best_transcript	GeneSymbol	Sequence	group-Test(raw)	group-Control(raw)	group-Test(normalized)	group-Control(normalized)	[CA_B541155, Test](raw)	[CA_B633270, Test](raw)	[CA_B629380, Test](raw)	[NC_B541155, Control](raw)	[NC_B633270, Control](raw)	[NC_B629380, Control](raw)	[CA_B541155, Test](normalized)	[CA_B633270, Test](normalized)	[CA_B629380, Test](normalized)	[NC_B541155, Control](normalized)	[NC_B633270, Control](normalized)	[NC_B629380, Control](normalized)	MRE1	MRE2	MRE3	MRE4	MRE5
ASCRP3003129	0.0414044	0.301761	11.9693	up	hsa_circRNA_100833	hsa_circ_0022383	circBase	chr11	+	61605249	61615756	exonic	NM_004265	FADS2	ATGTGAACATGCTGCACGTGTTTGTTCTGGGCGAATGGCAGCCCATCGAGGATGCCTTCC	1859.5	73.1667	9.86276	6.28148	4491.5	700	387	93	92	34.5	11.4582	8.74798	9.38213	6.59026	6.48548	5.76871	hsa-miR-765	hsa-miR-495-3p	hsa-miR-665	hsa-miR-193b-5p	hsa-miR-124-5p
ASCRP3004340	0.0206445	0.291043	5.61259	up	hsa_circRNA_001586	hsa_circ_0001586	circBase	chr6	-	26158407	26199796	sense overlapping	NM_003530	HIST1H3D	CAGGAGCAGACTTGGTAGGTTCAGGCATGATAAATAAACACTTCGTCCACAACCTAAAGA	3052.83	367.667	11.296	8.80729	3806.5	3584	1768	291	577.5	234.5	11.2331	10.8895	11.7653	8.37005	9.12719	8.92462	hsa-miR-619-5p	hsa-miR-4739	hsa-miR-7851-3p	hsa-miR-5787	hsa-miR-1273g-3p
ASCRP3008172	0.00733847	0.280343	4.741	up	hsa_circRNA_103831	hsa_circ_0072391	circBase	chr5	-	43295853	43297268	exonic	NM_002130	HMGCS1	GAGATAAAAATAGTATCTATAGTGGCCTGGAAGCCTTTGGGGCTTCGTGGGACACATATG	1272	195.667	9.9457	7.7005	1165	2093	558	140	342	105	9.72298	10.1841	9.93003	7.2015	8.31146	7.58855	hsa-miR-625-3p	hsa-miR-129-5p	hsa-miR-548c-3p	hsa-let-7c-5p	hsa-let-7b-5p
ASCRP3007235	0.023048	0.291043	4.15221	up	hsa_circRNA_103828	hsa_circ_0072386	circBase	chr5	-	43292575	43299077	exonic	NM_002130	HMGCS1	CTTTGGATGAAGGAGTAGGACTTGTGCATTCAAACATAGCAACTGAGCTCTTTCACCATG	1186.17	217.5	10.0405	7.98663	1092	1582.5	884	197	327.5	128	9.64569	9.82843	10.6474	7.73202	8.24049	7.98738	hsa-miR-411-5p	hsa-miR-625-3p	hsa-miR-448	hsa-miR-205-5p	hsa-miR-526b-5p
ASCRP3006378	0.0275475	0.295042	4.11367	up	hsa_circRNA_104296	hsa_circ_0079284	circBase	chr7	-	5680784	5692141	exonic	NM_207111	RNF216	CTCTGGACCGATCCCACTGAAACCTGTAGGAAGTGTCAGGGACTCTGGAAAGAACATAAT	4765.83	494	10.8825	8.84202	3722	10248	327.5	380	987	115	11.2123	12.3006	9.13448	8.78074	9.96166	7.78367	hsa-miR-153-5p	hsa-miR-525-5p	hsa-miR-125a-3p	hsa-miR-520a-5p	hsa-let-7i-5p
ASCRP3011615	0.00796824	0.285124	3.79167	up	hsa_circRNA_400633		25242744	chr10	+	102114183	102114389	exonic	NM_005063	SCD	TCTGACCTAGAAGCTGAGAAACTGGTGATGTTCCAGAGGAGAATGATGTCTATGAATGGG	335.333	71.6667	8.23138	6.30854	322	480	204	74	96	45	8.0041	8.25689	8.43315	6.24038	6.51995	6.16531	hsa-miR-5589-5p	hsa-miR-1253	hsa-miR-3127-3p	hsa-miR-541-3p	hsa-miR-3691-3p
ASCRP3007280	0.0125124	0.285124	3.78911	up	hsa_circRNA_027446	hsa_circ_0027446	circBase	chr12	+	66221780	66232349	exonic	NM_003483	HMGA2	GAAAAACGGCCAAGAGGCAGACCTAGGAAATGGGAACCAACCGGTGAGCCCTCTCCTAAG	2838	463.5	11.0684	9.1465	2257	4931	1326	448	699	243.5	10.5926	11.3253	11.2872	9.04263	9.4112	8.98566	hsa-miR-129-5p	hsa-miR-331-3p	hsa-miR-6882-3p	hsa-miR-3925-3p	hsa-miR-1236-3p
ASCRP3011619	0.0315827	0.295249	3.28687	up	hsa_circRNA_407024		25070500	chr7	-	149246283	149250107	exonic	NR_027789	ZNF767P	TCTGATACCGCTTGCAGAAGGGAATTGAATAGATGTCTCCCTATTGTAGATCTCTGGCTT	11363.8	1637.83	12.8033	11.0866	18775.5	12433	2883	2728	1566	619.5	13.1993	12.5905	12.6201	12.0779	10.7411	10.4407	hsa-miR-3978	hsa-miR-3198	hsa-miR-6728-3p	hsa-miR-4768-3p	hsa-miR-3127-3p
ASCRP3013009	0.0371987	0.300866	3.26868	up	hsa_circRNA_401518		25242744	chr16	-	3725324	3740986	exonic	NM_016292	TRAP1	TTCCCCTTGTACTTGAATGGAAGGCGGATGAACACCTTGCAGGAAAACCAATTCTGTGTC	386	82.3333	8.34356	6.63485	550	438.5	169.5	79	97	71	8.71817	8.1454	8.1671	6.38117	6.52974	6.99364	hsa-miR-3692-5p	hsa-miR-6503-5p	hsa-miR-4726-3p	hsa-miR-2276-3p	hsa-miR-4449
ASCRP3000566	0.0406877	0.301761	3.25666	up	hsa_circRNA_062557	hsa_circ_0062557	circBase	chr22	-	24108020	24109780	exonic	NM_213720	CHCHD10	AAGACACAAATGTGCAATTAAAAGTTTATTTTAGACCACACCGCCCAGCCGCGCCCTCTG	2907	578	11.2621	9.55874	3538	3303.5	1879.5	374	724	636	11.1663	10.7818	11.8383	8.7544	9.45622	10.4656	hsa-miR-6782-5p	hsa-miR-6846-5p	hsa-miR-6756-5p	hsa-miR-637	hsa-miR-6787-5p
ASCRP3006291	0.0411552	0.301761	3.20707	up	hsa_circRNA_102395	hsa_circ_0048104	circBase	chr19	+	805012	805187	exonic	NM_002819	PTBP1	CTCGCTGGACCAGACCATGGCCGCGGCCTTCGTCGCTGGACGGGCAGAACATCTACAACG	5885.5	841.667	11.6269	9.94563	10857	5835	964.5	917	1341	267	12.5421	11.5459	10.7926	10.2432	10.4662	9.12751	hsa-miR-185-3p	hsa-miR-616-3p	hsa-miR-330-5p	hsa-miR-138-5p	hsa-miR-485-5p
ASCRP3012138	0.0119172	0.285124	3.19602	up	hsa_circRNA_104893	hsa_circ_0008792	circBase	chr9	+	118969734	119033695	exonic	NM_002581	PAPPA	TGCCGACAAGAAGTCTCCTTCAATTGTATTGAGCCTACTTGGATGTTAATGAGCTGAAGA	828	166.833	9.2777	7.60143	817	1369	298	201	206	93.5	9.23377	9.62392	8.97543	7.75836	7.57884	7.46709	hsa-miR-199b-5p	hsa-miR-505-3p	hsa-miR-199a-5p	hsa-miR-766-5p	hsa-miR-764
ASCRP3007885	0.0256814	0.293158	3.10947	up	hsa_circRNA_065638	hsa_circ_0065638	circBase	chr3	-	49394608	49395791	exonic	NM_000581	GPX1	GACCAAGGCGAGTTTCCCCACTAATAAAGTGCCGGGTGTCAGCAGAACAGTTAAAAGGAG	932	188.167	9.47249	7.83582	1214	1255	327	239	194.5	131	9.77907	9.51187	9.12654	8.02016	7.48532	8.00199	hsa-miR-4733-3p	hsa-miR-4763-3p	hsa-miR-3155b	hsa-miR-3155a	hsa-miR-4270
ASCRP3006357	0.0261069	0.293158	3.10402	up	hsa_circRNA_003201	hsa_circ_0003201	circBase	chr4	+	6998051	7006651	exonic	NM_020773	TBC1D14	CTCTGAAGTGGAGAACGAAGAAATCTCCCAGCAAAACCAGCTGAAGAAGCTCAGAAGCAC	2707.33	422.833	10.5417	8.90759	2233	5444	445	418.5	679	171	10.5769	11.462	9.58633	8.94916	9.35815	8.41547	hsa-miR-103a-2-5p	hsa-miR-7157-3p	hsa-miR-5008-3p	hsa-miR-6737-3p	hsa-miR-6830-3p
ASCRP3009773	0.00649421	0.280343	3.08074	up	hsa_circRNA_000676	hsa_circ_0001234	circBase	chr22	+	41620952	41622347	sense overlapping	NM_031488	L3MBTL2	GGTCAAGTCAGGCCCCAGAACTGTCCCATTCCTTTAAGGTACGAGCAGTCTACACAGAAG	9510	1410.17	12.4989	10.8756	13148	13347	2035	1457.5	2190	583	12.7494	12.7041	12.0431	10.9575	11.3398	10.3294	hsa-miR-330-5p	hsa-miR-619-5p	hsa-miR-665	hsa-miR-326	hsa-miR-342-5p
ASCRP3006747	0.0422133	0.302545	3.02236	up	hsa_circRNA_103140	hsa_circ_0061891	circBase	chr21	+	45153949	45163688	exonic	NM_003681	PDXK	CTGGTGTACGGTTTTGGGATTTGAGATTGACGCGGTGAACTCTGTCCAGTTTTCAAACCA	1425.83	284.333	10.0347	8.439	1823	1983	471.5	249	408	196	10.3086	10.1199	9.67555	8.09814	8.58535	8.63352	hsa-miR-152-5p	hsa-miR-134-3p	hsa-miR-146a-3p	hsa-miR-383-3p	hsa-miR-452-3p
ASCRP3003895	0.0196732	0.291043	17.4354	down	hsa_circRNA_103752	hsa_circ_0006867	circBase	chr4	-	151388824	151412187	exonic	NM_006726	LRBA	CACCAACTTCAGAGATTTGTCCAAGATCTTGGCATATACAGAAGGGCTGCATGGAAAATG	69.5	1096	5.9271	10.0511	71	104.5	33	1043	2071	174	6.05932	6.28114	5.44084	10.4545	11.2589	8.43974	hsa-miR-141-3p	hsa-miR-29a-5p	hsa-miR-499a-3p	hsa-miR-570-5p	hsa-miR-26a-5p
ASCRP3001565	0.012172	0.285124	8.72886	down	hsa_circRNA_071106	hsa_circ_0071106	circBase	chr4	+	148778703	148803083	exonic	NM_024605	ARHGAP10	ACTGACTCCATTGACAGAAGGTTTTGTTTTGACATAGAAGCTGCTGATCGGAAGAAAAAA	110.667	801.333	6.63906	9.76485	97	180	55	630	1526	248	6.42869	6.99364	6.49484	9.59016	10.7036	9.00076	hsa-miR-1206	hsa-miR-29a-5p	hsa-miR-6830-3p	hsa-miR-4743-3p	hsa-miR-2682-3p
ASCRP3008005	0.0467023	0.307865	8.37225	down	hsa_circRNA_102293	hsa_circ_0000825	circBase	chr18	+	8718421	8720494	exonic	NM_015210	MTCL1	GACTGAAAGAGGATGAGTTAGATGAACTCCGTGCTGAGATGGAAGAGATGAGAGACAGTT	674.667	3456	8.8634	11.929	589	1250	185	3962	5944	462	8.79286	9.50188	8.29548	12.6986	13.0885	9.99991	hsa-miR-340-3p	hsa-miR-30a-5p	hsa-miR-145-5p	hsa-miR-30b-5p	hsa-miR-30e-5p
ASCRP3005032	0.0424052	0.302939	8.25088	down	hsa_circRNA_005232	hsa_circ_0005232	circBase	chr2	-	40655612	40657441	exonic	ENST00000403092	SLC8A1	CCAGAATGATGAAATTGTGTTGTGACAGTTGGAAGTGTCATGTACAACATGCGGCGATTA	233	1543.83	7.52867	10.5732	273	352	74	1659.5	2766	206	7.80587	7.85707	6.92307	11.2123	11.798	8.70944	hsa-miR-6888-5p	hsa-miR-27b-3p	hsa-miR-27a-3p	hsa-miR-3180-5p	hsa-miR-373-5p
ASCRP3004844	0.00343355	0.280343	6.86067	down	hsa_circRNA_405040		25070500	chr12	+	94562928	94580249	exonic	NM_005761	PLXNC1	CATTCGCTACAAAGAAAGAAGGGGATCAACCTGAAAGAGTCCAACCAATCGCATCATCTA	253	1117.67	7.80404	10.5824	257	372	130	903	1784	666	7.7255	7.915	7.77162	10.2196	10.9745	10.5531	hsa-miR-6507-5p	hsa-miR-5571-5p	hsa-miR-3927-3p	hsa-miR-3190-5p	hsa-miR-4529-5p
ASCRP3005903	0.00479287	0.280343	6.54626	down	hsa_circRNA_103820	hsa_circ_0072309	circBase	chr5	-	38523520	38530768	exonic	NM_002310	LIFR	CTACGTAAAGAGAGTATGGAGCTCGTAAAATTAGACTGACTGCATTGCACAGATGATGGA	46.3333	268.167	5.51991	8.23058	42	72	25	333.5	354	117	5.48446	5.89125	5.18401	8.56486	8.3547	7.77217	hsa-miR-875-3p	hsa-miR-516b-5p	hsa-miR-525-5p	hsa-miR-515-5p	hsa-miR-520a-5p
ASCRP3006552	0.00152775	0.275839	5.9829	down	hsa_circRNA_046843	hsa_circ_0046843	circBase	chr18	+	9195548	9221997	exonic	NM_015208	ANKRD12	CTGATGATGATGAAAGTTACACAGAGTAAAGACAAGATTGCATCCTACAGCAAAACTCCA	168.667	653.833	7.01257	9.59342	105.5	337	63.5	537	1137.5	287	6.57647	7.79563	6.66562	9.33021	10.1996	9.25044	hsa-miR-4524a-5p	hsa-miR-4753-3p	hsa-miR-3911	hsa-miR-876-5p	hsa-miR-942-5p
ASCRP3008354	0.0469683	0.308779	5.6132	down	hsa_circRNA_042103	hsa_circ_0042103	circBase	chr17	+	12608444	12626325	exonic	NM_153604	MYOCD	GAGGCCATAAAAGTTTTACAGTTAAGACTTCAACAAAGAAGGACCCAGGAACAACTGGCT	60.8333	334	5.91617	8.40499	50	92	40.5	405	508	89	5.66235	6.11416	5.972	8.90017	8.94794	7.36686	hsa-miR-4307	hsa-miR-33a-3p	hsa-miR-4775	hsa-miR-1244	hsa-miR-6783-3p
ASCRP3009267	0.0257157	0.293158	5.59968	down	hsa_circRNA_102854	hsa_circ_0057104	circBase	chr2	+	173433468	173457776	exonic	NM_002610	PDK1	GCTGTATTCCCTAGAGGGTTACGGGACAGATGCAGTTATCTACATTAAGCAAAATCACCA	199.667	841.333	7.54488	10.0302	254	224	121	765.5	1399.5	359	7.70173	7.28173	7.65119	9.95022	10.5589	9.58155	hsa-miR-362-5p	hsa-miR-500a-5p	hsa-miR-30a-5p	hsa-miR-30e-5p	hsa-miR-21-3p
ASCRP3009598	0.029347	0.295199	5.5995	down	hsa_circRNA_091419	hsa_circ_0091419	circBase	chrX	-	118920468	118923974	exonic	ENST00000361575	RPL39	GGCCTTTCTTTTTTCTTCTCACAAGACTTTCAGGATTAAGCGATTCCTGGCCAAGAAACA	507.167	1618.83	8.77644	11.2617	451	766.5	304	2302	1542.5	1012	8.4619	8.85986	9.00755	11.7834	10.7166	11.2853	hsa-miR-5586-5p	hsa-miR-4453	hsa-miR-145-5p	hsa-miR-3916	hsa-miR-3613-5p
ASCRP3000965	0.0131425	0.285124	5.51832	down	hsa_circRNA_102855	hsa_circ_0057105	circBase	chr2	+	173433468	173460751	exonic	NR_103729	PDK1	AATTTGGAAGCAAAATCACCAGGACAGCCAATACAAGTGGTTTATGTACCATCCCATCTC	210.333	848.667	7.59599	10.0602	226.5	283	121.5	751.5	1405.5	389	7.53673	7.56811	7.68313	9.90379	10.5679	9.70897	hsa-miR-637	hsa-miR-362-5p	hsa-miR-500a-5p	hsa-miR-30a-5p	hsa-miR-511-5p
ASCRP3007867	0.0359174	0.299561	5.31412	down	hsa_circRNA_104738	hsa_circ_0008732	circBase	chr9	-	16727794	16738483	exonic	NM_017637	BNC2	GACATGGCAAAACGCTGATACTAACCTCTTATTCAGAATGTCCCAACAGGCACACCTTGG	153.833	663.333	7.1473	9.55713	148	224.5	89	816	972	202	6.98986	7.26697	7.18507	10.0525	9.93483	8.68409	hsa-miR-655-5p	hsa-miR-19b-1-5p	hsa-miR-19b-2-5p	hsa-miR-877-3p	hsa-miR-130b-5p
ASCRP3011501	0.0357272	0.299561	5.26493	down	hsa_circRNA_402901		25242744	chr3	-	71743025	71748859	exonic	NM_173359	EIF4E3	TCGGGGAACAGTTCACAGACTGTGCCGCAGCAGATATTTTGGAGTGTATACAATAATATC	107.5	501.5	6.76648	9.1629	86.5	149	87	481.5	821	202	6.33723	6.76071	7.2015	9.16297	9.65795	8.66777	hsa-miR-6845-3p	hsa-miR-4279	hsa-miR-450a-2-3p	hsa-miR-520h	hsa-miR-520g-3p
ASCRP3009538	0.0368278	0.300679	5.24919	down	hsa_circRNA_104547	hsa_circ_0001776	circBase	chr7	-	158552176	158557544	exonic	NM_020728	ESYT2	GGATTCAGCAAGGAACCTTCCGGGTGTTCTAAGGATACATTTTATTGAAGCTCAGGATCT	548.833	1855.5	8.83859	11.2307	628	766	252.5	2077.5	2933	556	8.89564	8.85532	8.7648	11.5435	11.9069	10.2417	hsa-miR-623	hsa-miR-597-3p	hsa-miR-525-3p	hsa-miR-524-3p	hsa-miR-511-5p
ASCRP3005112	0.0281445	0.295042	5.24299	down	hsa_circRNA_006473	hsa_circ_0006473	circBase	chr4	+	148867767	148887990	exonic	NM_024605	ARHGAP10	CCATGAAAAGATGTAAAAACATGCAATGAGGTGGACCTGGAGAATTCTGCAGATTGGGAA	51.3333	260.833	5.70932	8.09971	40	72.5	41.5	273	416.5	93	5.42972	5.84599	5.85225	8.25276	8.62273	7.42363	hsa-miR-1299	hsa-miR-152-5p	hsa-miR-7843-5p	hsa-miR-8062	hsa-miR-2467-5p
ASCRP3012578	0.0440749	0.305598	5.20271	down	hsa_circRNA_103729	hsa_circ_0002474	circBase	chr4	-	120517677	120528452	exonic	NM_001083	PDE5A	TGTATGCCAATTAAGAATCATAGGGAAGAGAGAAATGGTCAATGCATGGTTTGCTGAGAG	92	393.833	6.38273	8.762	71	150	55	546	502.5	133	5.99857	6.74061	6.40902	9.3542	8.92512	8.00667	hsa-miR-670-3p	hsa-miR-583	hsa-miR-455-3p	hsa-miR-510-3p	hsa-miR-500a-5p
