# Supplementary material for: Potential and functional prediction of six circular RNAs as diagnostic markers for colorectal cancer
Source: PeerJ. 2022 May 19;10:e13420. doi: 10.7717/peerj.13420 (PMC9124462; doi:10.7717/peerj.13420)
Supplement: Data S2 [file peerj-10-13420-s003.xls]

## Sheet: Sheet1
hsa_ circRNA_100833		NC	CA	NC	CA	NC	CA	NC	CA	NC	CA	NC	CA	NC	CA	NC	CA	NC	CA	NC	CA	NC	CA	NC	CA	NC	CA	NC	CA	NC	CA	NC	CA	NC	CA	NC	CA	NC	CA	NC	CA	NC	CA	NC	CA	NC	CA	NC	CA
		1	1	2	2	3	3	4	4	5	5	6	6	7	7	8	8	9	9	10	10	11	11	12	12	13	13	14	14	15	15	16	16	17	17	18	18	19	19	20	20	21	21	22	22	23	23	24	24
	△CT mean	16.2806	13.1243	15.7747	15.5483	17.3643	15.1273	14.8592	14.2419	16.1123	15.0366	15.331	13.5415	16.391	13.0281	14.7892	14.6622	18.235	16.2815	15.304	15.0569	16.9605	15.6589	15.8266	15.7685	18.6222	17.3827	16.3849	15.7294	13.7831	11.7307	14.9771	14.4584	14.4331	14.1025	15.1019	14.238	15.8253	14.8693	19.1449	18.43	14.2093	14.1028	14.1259	12.8303	18.3481	17.5534	18.5616	15.6937
	△△CT	15.2806	12.1243	14.7747	14.5483	16.3643	14.1273	13.8592	13.2419	15.1123	14.0366	14.331	12.5415	15.391	12.0281	13.7892	13.6622	17.235	15.2815	14.304	14.0569	15.9605	14.6589	14.8266	14.7685	17.6222	16.3827	15.3849	14.7294	12.7831	10.7307	13.9771	13.4584	13.4331	13.1025	14.1019	13.238	14.8253	13.8693	18.1449	17.43	13.2093	13.1028	13.1259	11.8303	17.3481	16.5534	17.5616	14.6937
	2^-△△CT	2.51235e-05	0.000223981	3.56753e-05	4.17381e-05	1.18536e-05	5.58809e-05	6.72934e-05	0.000103226	2.82331e-05	5.95056e-05	4.85207e-05	0.000167738	2.32725e-05	0.000239428	7.06355e-05	7.71364e-05	6.48259e-06	2.51077e-05	4.94379e-05	5.86752e-05	1.56828e-05	3.86581e-05	3.44147e-05	3.58303e-05	4.95655e-06	1.17036e-05	2.33717e-05	3.68141e-05	0.000141869	0.000588475	6.20103e-05	8.88441e-05	9.04157e-05	0.000113695	5.68714e-05	0.000103507	3.44472e-05	6.68243e-05	3.45011e-06	5.66282e-06	0.000105587	0.000113676	0.00011187	0.000274609	5.99379e-06	1.03977e-05	5.16944e-06	3.77353e-05
hsa_ circRNA_103831		NC	CA	NC	CA	NC	CA	NC	CA	NC	CA	NC	CA	NC	CA	NC	CA	NC	CA	NC	CA	NC	CA	NC	CA	NC	CA	NC	CA	NC	CA	NC	CA	NC	CA	NC	CA	NC	CA	NC	CA	NC	CA	NC	CA	NC	CA	NC	CA
		1	1	2	2	3	3	4	4	5	5	6	6	7	7	8	8	9	9	10	10	11	11	12	12	13	13	14	14	15	15	16	16	17	17	18	18	19	19	20	20	21	21	22	22	23	23	24	24
	△CT mean	18.5989	15.9772	17.7638	16.9153	15.3225	14.8162	16.2388	14.5544	17.4038	15.9651	16.0173	15.0117	15.3463	14.5132	14.8684	13.2996	15.5419	14.614	16.2081	15.0194	18.5251	16.2071	18.9792	17.2242	18.3012	16.3466	17.0475	15.3777	19.5214	17.6048	17.6863	16.2069	16.0465	15.4431	19.8839	18.8266	16.2506	15.0302	19.8679	15.8861	16.2856	15.9213	17.2666	16.7144	17.5142	16.3191	16.2385	15.5188
	△△CT	18.5989	15.9772	17.7638	16.9153	15.3225	14.8162	16.2388	14.5544	17.4038	15.9651	16.0173	15.0117	15.3463	14.5132	14.8684	13.2996	15.5419	14.614	16.2081	15.0194	18.5251	16.2071	18.9792	17.2242	18.3012	16.3466	17.0475	15.3777	19.5214	17.6048	17.6863	16.2069	16.0465	15.4431	19.8839	18.8266	16.2506	15.0302	19.8679	15.8861	16.2856	15.9213	17.2666	16.7144	17.5142	16.3191	16.2385	15.5188
	2^-△△CT	2.51874e-06	1.55018e-05	4.49342e-06	8.09053e-06	2.44035e-05	3.46639e-05	1.29311e-05	4.15608e-05	5.76688e-06	1.56326e-05	1.50769e-05	3.02707e-05	2.40051e-05	4.27655e-05	3.34319e-05	9.9179e-05	2.09616e-05	3.98797e-05	1.32094e-05	3.01103e-05	2.65087e-06	1.32183e-05	1.93502e-06	6.53132e-06	3.09596e-06	1.19999e-05	7.38234e-06	2.34886e-05	1.32886e-06	5.01686e-06	4.74109e-06	1.322e-05	1.47753e-05	2.24474e-05	1.03356e-06	2.15089e-06	1.28259e-05	2.98849e-05	1.04513e-06	1.65121e-05	1.25179e-05	1.61139e-05	6.34215e-06	9.29984e-06	5.34203e-06	1.22314e-05	1.2934e-05	2.12991e-05
hsa_circRNA_103828		NC	CA	NC	CA	NC	CA	NC	CA	NC	CA	NC	CA	NC	CA	NC	CA	NC	CA	NC	CA	NC	CA	NC	CA	NC	CA	NC	CA	NC	CA	NC	CA	NC	CA	NC	CA	NC	CA	NC	CA	NC	CA	NC	CA	NC	CA	NC	CA
		1	1	2	2	3	3	4	4	5	5	6	6	7	7	8	8	9	9	10	10	11	11	12	12	13	13	14	14	15	15	16	16	17	17	18	18	19	19	20	20	21	21	22	22	23	23	24	24
	△CT mean	17.9877	16.733	17.5817	14.5768	14.5678	14.0053	16.9932	14.9338	17.8226	17.0141	17.3629	16.6335	15.9415	14.897	16.1464	15.2939	16.0122	15.7684	14.9964	13.9856	13.2663	12.8	15.0672	14.9512	14.6426	13.558	15.8646	14.7438	16.3759	15.7829	16.818	15.1765	15.2313	14.5055	15.0261	14.169	18.3139	17.8041	17.5667	16.6998	14.9601	14.0832	16.3888	15.639	16.2625	15.4492	16.6955	15.8669
	△△CT	17.9877	16.733	17.5817	14.5768	14.5678	14.0053	16.9932	14.9338	17.8226	17.0141	17.3629	16.6335	15.9415	14.897	16.1464	15.2939	16.0122	15.7684	14.9964	13.9856	13.2663	12.8	15.0672	14.9512	14.6426	13.558	15.8646	14.7438	16.3759	15.7829	16.818	15.1765	15.2313	14.5055	15.0261	14.169	18.3139	17.8041	17.5667	16.6998	14.9601	14.0832	16.3888	15.639	16.2625	15.4492	16.6955	15.8669
	2^-△△CT	3.84735e-06	9.18064e-06	5.09789e-06	4.09219e-05	4.11778e-05	6.08101e-05	7.66547e-06	3.19513e-05	4.31394e-06	7.55496e-06	5.93272e-06	9.83588e-06	1.589e-05	3.2775e-05	1.37864e-05	2.48924e-05	1.51305e-05	1.79161e-05	3.05929e-05	6.16464e-05	0.000101493	0.000140217	2.91285e-05	3.15682e-05	3.90958e-05	8.29129e-05	1.676e-05	3.64483e-05	1.17588e-05	1.77365e-05	8.65525e-06	2.7003e-05	2.59961e-05	4.29932e-05	2.99698e-05	5.42869e-05	3.06873e-06	4.36942e-06	5.15093e-06	9.39433e-06	3.1373e-05	5.76163e-05	1.16542e-05	1.95969e-05	1.27206e-05	2.23526e-05	9.42205e-06	1.67336e-05
hsa_circRNA_103752		NC	CA	NC	CA	NC	CA	NC	CA	NC	CA	NC	CA	NC	CA	NC	CA	NC	CA	NC	CA	NC	CA	NC	CA	NC	CA	NC	CA	NC	CA	NC	CA	NC	CA	NC	CA	NC	CA	NC	CA	NC	CA	NC	CA	NC	CA	NC	CA
		1	1	2	2	3	3	4	4	5	5	6	6	7	7	8	8	9	9	10	10	11	11	12	12	13	13	14	14	15	15	16	16	17	17	18	18	19	19	20	20	21	21	22	22	23	23	24	24
	△CT mean	6.31844	13.3838	8.17523	16.0472	8.89598	13.124	4.1782	13.8991	3.64027	12.1856	3.01213	9.78856	6.47273	12.987	5.74278	13.8774	4.6491	7.5787	4.94188	14.8311	9.34615	12.9529	6.31974	13.6454	7.1497	13.2785	6.1582	12.8024	3.61604	12.3342	4.42649	12.6176	4.92544	9.63595	3.21328	9.83184	4.01378	11.9044	6.03574	15.5311	5.65819	12.4127	5.33995	11.2513	4.9068	12.9736	7.19054	10.6107
	△△CT	0	7.06539	1.85679	9.72879	2.57754	6.80555	-2.14024	7.5807	-2.67817	5.86718	-3.30631	3.47012	0.154291	6.66855	-0.575663	7.55894	-1.66934	1.26026	-1.37656	8.51266	3.02771	6.63446	0.00130208	7.32698	0.83126	6.96005	-0.160243	6.48397	-2.7024	6.01575	-1.89195	6.29913	-1.393	3.31751	-3.10516	3.5134	-2.30466	5.586	-0.2827	9.21266	-0.660254	6.09422	-0.97849	4.93283	-1.41164	6.65513	0.872104	4.29231
	2^-△△CT	1	0.00746632	0.276089	0.00117853	0.167526	0.00893975	4.40836	0.00522374	6.40043	0.0171318	9.89233	0.0902381	0.898574	0.00983031	1.49036	0.00530314	3.18068	0.417467	2.59649	0.002738	0.122622	0.0100653	0.999098	0.00622816	0.562038	0.00803185	1.11748	0.011172	6.50882	0.0154553	3.71136	0.0126991	2.62625	0.100307	8.60493	0.087571	4.9405	0.0208183	1.21647	0.00168544	1.58036	0.0146372	1.9704	0.0327393	2.6604	0.00992219	0.546349	0.0510372
hsa_circRNA_071106		NC	CA	NC	CA	NC	CA	NC	CA	NC	CA	NC	CA	NC	CA	NC	CA	NC	CA	NC	CA	NC	CA	NC	CA	NC	CA	NC	CA	NC	CA	NC	CA	NC	CA	NC	CA	NC	CA	NC	CA	NC	CA	NC	CA	NC	CA	NC	CA
		1	1	2	2	3	3	4	4	5	5	6	6	7	7	8	8	9	9	10	10	11	11	12	12	13	13	14	14	15	15	16	16	17	17	18	18	19	19	20	20	21	21	22	22	23	23	24	24
	△CT mean	4.5651	9.04396	6.7147	9.48977	7.81136	10.1792	4.19333	8.4568	3.47671	8.51207	3.51448	6.87384	6.08285	8.96148	4.88731	9.37976	4.48771	5.47397	4.40919	11.2274	6.64934	8.9986	5.13963	9.93362	6.27497	10.0874	6.25357	7.36858	4.57552	7.80255	4.81975	6.51531	5.0275	6.34135	2.6786	7.13712	3.27337	8.36828	5.18061	9.75883	4.96505	8.56796	3.71711	5.68413	5.22439	9.69135	4.32084	7.02581
	△△CT	0	4.47886	2.1496	4.92467	3.24626	5.61406	-0.371762	3.89171	-1.08839	3.94697	-1.05062	2.30874	1.51775	4.39638	0.322212	4.81467	-0.0773902	0.908873	-0.155901	6.66233	2.08425	4.4335	0.574535	5.36852	1.70987	5.52229	1.68848	2.80349	0.0104275	3.23745	0.254654	1.95021	0.4624	1.77625	-1.8865	2.57203	-1.29173	3.80318	0.615513	5.19373	0.39995	4.00286	-0.847982	1.11903	0.65929	5.12626	-0.244257	2.46072
	2^-△△CT	1	0.0448465	0.225374	0.0329251	0.105385	0.0204174	1.29393	0.067372	2.12636	0.0648399	2.07142	0.201836	0.34923	0.0474851	0.799842	0.0355337	1.05511	0.532601	1.11412	0.00987277	0.235819	0.0462789	0.671502	0.0242055	0.305687	0.0217582	0.310254	0.14324	0.992798	0.10603	0.838188	0.258778	0.725778	0.291941	3.69737	0.168168	2.44821	0.0716354	0.652698	0.0273231	0.757885	0.0623762	1.79998	0.460403	0.63319	0.0286315	1.18448	0.181656
hsa_circRNA_102293		NC	CA	NC	CA	NC	CA	NC	CA	NC	CA	NC	CA	NC	CA	NC	CA	NC	CA	NC	CA	NC	CA	NC	CA	NC	CA	NC	CA	NC	CA	NC	CA	NC	CA	NC	CA	NC	CA	NC	CA	NC	CA	NC	CA	NC	CA	NC	CA
		1	1	2	2	3	3	4	4	5	5	6	6	7	7	8	8	9	9	10	10	11	11	12	12	13	13	14	14	15	15	16	16	17	17	18	18	19	19	20	20	21	21	22	22	23	23	24	24
	△CT mean	6.48759	10.4625	6.43949	9.13431	7.97347	12.4865	4.81028	7.93082	4.77293	10.7049	3.82501	7.65792	3.34803	9.37329	5.64249	10.6004	4.53681	6.40348	5.07891	9.43349	9.1072	9.55569	6.7175	7.61687	8.06439	12.0738	8.47657	8.94686	5.65548	8.31806	5.34382	8.46617	6.71688	10.0209	3.87236	10.6936	3.93413	9.09684	6.83278	10.5359	5.69758	10.3782	6.65586	7.76754	7.0739	10.2457	7.16501	9.31711
	△△CT	0	3.97487	-0.0481014	2.64672	1.48588	5.99888	-1.67731	1.44322	-1.71466	4.2173	-2.66258	1.17033	-3.13956	2.8857	-0.8451	4.11279	-1.95078	-0.0841088	-1.40868	2.9459	2.61961	3.06809	0.22991	1.12928	1.5768	5.58621	1.98898	2.45926	-0.832115	1.83047	-1.14377	1.97858	0.229282	3.53326	-2.61523	4.20606	-2.55346	2.60925	0.345192	4.0483	-0.790016	3.8906	0.16827	1.27995	0.586304	3.75806	0.67742	2.82952
	2^-△△CT	1	0.063598	1.0339	0.159683	0.35703	0.0156371	3.19832	0.367745	3.28219	0.0537609	6.33166	0.44432	8.81255	0.135306	1.79639	0.0577999	3.86584	1.06003	2.65494	0.129777	0.162712	0.119237	0.852688	0.457144	0.335225	0.0208153	0.251917	0.181839	1.78029	0.281173	2.20958	0.25374	0.853059	0.0863738	6.12722	0.0541815	5.87041	0.163884	0.787203	0.0604422	1.72909	0.0674238	0.889909	0.411811	0.666047	0.0739111	0.625283	0.140679
[truncated: 18 more columns]
